# Supplementary material for: Clinical experiences and predictors of success of treatment with vedolizumab in IBD patients: a cohort study
Source: PubMed Central journal article supplement (PMC7821503; doi:10.1186/s12876-021-01604-z), 2021-01-22
Supplement: 12876_2021_1604_MOESM1_ESM.pdf [file 12876_2021_1604_MOESM1_ESM.pdf]

**Supplementary Table 1**

Corticosteroid-Free Remission at week 17+/- 0.5: Univariable analysis of baseline parameters in patients with UC.

|                                                 | UC patients with<br>CLINICAL STEROID-<br>FREE REMISSION | UC patients with NO<br>CLINICAL STEROID-<br>FREE REMISSION | p-value |   |
|-------------------------------------------------|---------------------------------------------------------|------------------------------------------------------------|---------|---|
| Disease duration from initial diagnosis [years] | 9.2 ± 1.6                                               | 8.0 ± 1.0                                                  | 0.59    | M |
| Age at initial diagnosis [years]                | 35.5 ± 2.5                                              | 33.0 ± 1.8                                                 | 0.38    | M |
| CRP [mg/L]                                      | 10.1 ± 2.8                                              | 7.9 ± 1.3                                                  | 0.81    | M |
| Hb [g/dL]                                       | 13.4 ± 0.4                                              | 12.4 ± 0.3                                                 | 0.03    | M |
| Leukocytes x10 <sup>3</sup> /μL                 | 9.5 ± 0.7                                               | 9.3 ± 0.5                                                  | 0.54    | M |
| Endoscopic disease activity                     | 2.3 ± 0.2                                               | 2.2 ± 0.1                                                  | 0.52    | M |
| Clinical disease activity                       | 3.5 ± 0.3                                               | 4.2 ± 0.2                                                  | 0.05    | M |
| Disease extent (E1/E2/E3)/n (%)                 | (2/18/11)/31 (6/58/36)                                  | (5/33/34)/72 (7/46/47)                                     | 0.51    | C |
| First flare treated with corticosteroids (%)    | 28/30 (93)                                              | 57/71 (80)                                                 | 0.14    | F |
| Previous treatment with anti TNF-α antibody (%) | 22/31 (71)                                              | 56/73 (77)                                                 | 0.62    | F |
| Active smoking (%)                              | 2/30 (7)                                                | 6/74 (8)                                                   | >0.99   | F |
| Concomitant corticosteroid therapy (%)          | 14/30 (47)                                              | 38/69 (55)                                                 | 0.51    | F |
| Prior bowel surgery (%)                         | 0/31 (0)                                                | 1/74 (1)                                                   | >0.99   | F |
| Extraintestinal manifestations (%)              | 4/31 (13)                                               | 10/75 (13)                                                 | >0.99   | F |

Data are presented as mean ± standard error of mean or frequencies (%).

<sup>M</sup> Mann-Whitney-U test

<sup>C</sup> Chi-square test

<sup>F</sup> Fisher exact test

<sup>U</sup> Unpaired t test

## Supplementary Table 2

Clinical remission after one year of treatment: Univariable analysis of baseline parameters in patients with UC.

|                                                    | UC patients with<br>CLINICAL<br>REMISSION after<br>one year on<br>treatment | UC patients with NO<br>CLINICAL REMISSION<br>after one year on<br>treatment | P value |   |
|----------------------------------------------------|-----------------------------------------------------------------------------|-----------------------------------------------------------------------------|---------|---|
| Disease duration from<br>initial diagnosis [years] | 10.3±1.8                                                                    | 9±2.05                                                                      | 0.85    | M |
| Age at initial diagnosis<br>[years]                | 32.7±2.29                                                                   | 36.9±3.74                                                                   | 0.35    | M |
| CRP [mg/L]                                         | 2.22±9.09                                                                   | 1.28±6.41                                                                   | 0.68    | M |
| Hb [g/dL]                                          | 13.3±0.38                                                                   | 12.8±0.45                                                                   | 0.23    | M |
| Leukocytes x10 <sup>3</sup> /μL                    | 9.54±0.70                                                                   | 9.04±0.83                                                                   | 0.66    | M |
| Endoscopic disease<br>activity                     | 2.32±0.15                                                                   | 2.23±0.23                                                                   | 0.74    | M |
| Clinical disease activity                          | 0.26±3.5                                                                    | 0.47±4.6                                                                    | 0.049   | M |
| Disease extent<br>(E1/E2/E3)/n (%)                 | (4/17/18)/39<br>(10/44/46)                                                  | (1/10/5)/16 (6/63/31)                                                       | 0.44    | C |
| First flare treated with<br>corticosteroids (%)    | 34/39 (87)                                                                  | 11/15 (73)                                                                  | 0.24    | F |
| Previous treatment with<br>anti TNF-α antibody (%) | 27/39 (69)                                                                  | 14/16 (88)                                                                  | 0.19    | F |
| Active smoking (%)                                 | 2/40 (5)                                                                    | 1/16 (6)                                                                    | >0.99   | F |
| Concomitant<br>corticosteroid therapy<br>(%)       | 21/39 (54)                                                                  | 10/16 (63)                                                                  | 0.77    | F |
| Extraintestinal<br>Manifestations (%)              | 2/40 (5)                                                                    | 3/16 (19)                                                                   | 0.14    | F |

Data are presented as mean ± standard error of mean or frequencies (%).

<sup>M</sup> Mann-Whitney-U test

<sup>C</sup> Chi-square test

<sup>F</sup> Fisher exact test

### Supplementary Table 3

Clinical corticosteroid-free remission after one year of treatment: Univariable analysis of baseline parameters in patients with UC.

|                                                    | UC patients with<br>CLINICAL STEROID-<br>FREE REMISSION after<br>one year on treatment | UC patients with NO<br>CLINICAL STEROID-<br>FREE REMISSION<br>after one year on<br>treatment | P value |   |
|----------------------------------------------------|----------------------------------------------------------------------------------------|----------------------------------------------------------------------------------------------|---------|---|
| Disease duration from<br>initial diagnosis [years] | 10.6±1.86                                                                              | 8.75±1.83                                                                                    | 0.87    | M |
| Age at initial diagnosis<br>[years]                | 31.6±2.26                                                                              | 38.7±3.58                                                                                    | 0.11    | M |
| CRP [mg/L]                                         | 9.03±2.33                                                                              | 6.85±1.34                                                                                    | 0.52    | M |
| Hb [g/dL]                                          | 13.2±0.4                                                                               | 13±0.43                                                                                      | 0.48    | M |
| Leukocytes x10 <sup>3</sup> /μL                    | 9.55±0.75                                                                              | 9.06±0.74                                                                                    | 0.77    | M |
| Endoscopic disease<br>activity                     | 2.39±0.15                                                                              | 2.13±0.22                                                                                    | 0.32    | M |
| Clinical disease activity                          | 3.5±0.26                                                                               | 4.47±0.44                                                                                    | 0.08    | M |
| Disease extent<br>(E1/E2/E3)/n (%)                 | (4/16/17)/37 (11/43/46)                                                                | (1/11/6)/18 (6/61/33)                                                                        | 0.45    | C |
| First flare treated with<br>corticosteroids (%)    | 32/37 (86)                                                                             | 13/17 (76)                                                                                   | 0.44    | F |
| Previous treatment with<br>anti TNF-α antibody (%) | 26/37 (70)                                                                             | 15/18 (83)                                                                                   | 0.35    | F |
| Active smoking (%)                                 | 2/38 (5)                                                                               | 1/18 (6)                                                                                     | >0.99   | F |
| Concomitant<br>corticosteroid therapy<br>(%)       | 19/37 (51)                                                                             | 12/18 (67)                                                                                   | 0.39    | F |
| Extraintestinal<br>Manifestations (%)              | 2/38 (5)                                                                               | 3/18 (17)                                                                                    | 0.31    | F |

Data are presented as mean ± standard error of mean or frequencies (%).

<sup>M</sup> Mann-Whitney-U test

<sup>C</sup> Chi-square test

<sup>F</sup> Fisher exact test

### Supplementary Table 4

Endoscopic remission: Univariable analysis of baseline parameters in patients with UC.

|                                                    | UC patients with<br>ENDOSCOPIC<br>REMISSION | UC patients with NO<br>ENDOSCOPIC<br>REMISSION | P value |   |
|----------------------------------------------------|---------------------------------------------|------------------------------------------------|---------|---|
| Disease duration from<br>initial diagnosis [years] | 10.1±2.01                                   | 7.83±1.3                                       | 0.54    | M |
| Age at initial diagnosis<br>[years]                | 33.4±2.83                                   | 32.4±2.49                                      | 0.73    | M |
| CRP [mg/L]                                         | 9.34±2.51                                   | 8.45±1.65                                      | 0.84    | M |
| Hb [g/dL]                                          | 12.7±0.45                                   | 12.2±0.39                                      | 0.39    | U |
| Leukocytes x10 <sup>3</sup> /μL                    | 10.1±0.73                                   | 9.27±0.63                                      | 0.42    | M |
| Endoscopic disease<br>activity                     | 2.41±0.15                                   | 2.29±0.11                                      | 0.28    | M |
| Clinical disease activity                          | 3.79±0.31                                   | 4.88±0.32                                      | 0.02    | M |
| Disease extent<br>(E1/E2/E3)/n (%)                 | (3/17/9)/29<br>(10/52/59)                   | (2/15/17)/34<br>(6/44/50)                      | 0.30    | C |
| First flare treated with<br>corticosteroids (%)    | 22/27 (81)                                  | 28/33 (85)                                     | 0.74    | F |
| Previous treatment with<br>anti TNF-α antibody (%) | 24/29 (83)                                  | 28/34 (82)                                     | >0.99   | F |
| Active smoking (%)                                 | 2/29 (7)                                    | 3/35 (9)                                       | >0.99   | F |
| Concomitant<br>corticosteroid therapy<br>(%)       | 14/27 (52)                                  | 30/42 (71)                                     | 0.13    | F |
| Extraintestinal<br>Manifestations (%)              | 6/29 (21)                                   | 3/35 (9)                                       | 0.28    | F |

<sup>M</sup> Mann-Withney-U test

<sup>U</sup> Unpaired t test

<sup>C</sup> Chi-square test

<sup>F</sup> Fisher exact test

### Supplementary Table 5

Multivariable logistic regression analysis of secondary endpoints in patients with UC.

| PARAMETER                                                     | OR   | 95% CI (profile likelihood) | P value | P value summary |
|---------------------------------------------------------------|------|-----------------------------|---------|-----------------|
| <b>CINICAL CORTICOSTEROID-FREE REMISSION at week 17+/-0.5</b> |      |                             |         |                 |
| Hb [g/dL]                                                     | 1.32 | 1.02 to 1.76                | 0.04    | *               |
| Clinical disease activity                                     | 0.73 | 0.52 to 0.98                | 0.04    | *               |
| First flare treated with corticosteroids                      | 4.13 | 0.89 to 30.9                | 0.10    | ns              |
| <b>CLINICAL REMISSION after one year</b>                      |      |                             |         |                 |
| Endoscopic disease activity                                   | 2.07 | 0.69 to 6.57                | 0.19    | ns              |
| Clinical disease activity                                     | 0.63 | 0.37 to 0.99                | 0.06    | ns              |
| Previous treatment with anti TNF- $\alpha$ antibody           | 0.27 | 0.03 to 1.81                | 0.21    | ns              |
| Extraintestinal Manifestations                                | 0.28 | 0.02 to 2.97                | 0.27    | ns              |
| <b>CINICAL CORTICOSTEROID-FREE REMISSION after one year</b>   |      |                             |         |                 |
| Age at initial diagnosis [years]                              | 0.97 | 0.92 to 1.01                | 0.09    | ns              |
| Clinical disease activity                                     | 0.69 | 0.46 to 1                   | 0.06    | ns              |
| <b>ENDOSCOPIC REMISSION</b>                                   |      |                             |         |                 |
| Clinical disease activity                                     | 0.71 | 0.51 to 0.98                | 0.04    | *               |
| Concomitant corticosteroid therapy                            | 0.49 | 0.15 to 1.47                | 0.21    | ns              |

OR, Odds ratio

**Supplementary Table 6**

Corticosteroid-free remission at week 17+/-0.5: Univariable analysis of baseline parameters in patients with CD.

|                                                 | CD patients with<br>CLINICAL STEROID-<br>FREE REMISSION | CD patients with NO<br>CLINICAL STEROID-<br>FREE REMISSION | p-<br>value |   |
|-------------------------------------------------|---------------------------------------------------------|------------------------------------------------------------|-------------|---|
| Disease duration from initial diagnosis [years] | 13.1 ± 2.1                                              | 12.8 ± 1.3                                                 | 0.90        | M |
| Age at initial diagnosis [years]                | 28.4 ± 2.6                                              | 24.0 ± 1.6                                                 | 0.08        | M |
| CRP [mg/L]                                      | 6.1 ± 1.6                                               | 13.3 ± 2.8                                                 | 0.12        | M |
| Hb [g/dL]                                       | 13.6 ± 0.4                                              | 12.6 ± 0.3                                                 | 0.06        | U |
| Leukocytes x10 <sup>3</sup> /μL                 | 8.5 ± 0.7                                               | 10.5 ± 0.6                                                 | 0.08        | M |
| Endoscopic disease activity                     | 14.9 ± 1.7                                              | 12.9 ± 1.4                                                 | 0.46        | U |
| Clinical disease activity                       | 6.3 ± 0.9                                               | 8.9 ± 0.7                                                  | 0.04        | M |
| Disease extent (L1/L2/L3)/n (%)                 | (2/3/17)/22 (9/14/77)                                   | (12/7/32)/51 (24/14/63)                                    | 0.34        | C |
| First flare treated with corticosteroids (%)    | 15/20 (75)                                              | 46/51 (90)                                                 | 0.13        | F |
| Previous treatment with anti TNF-α antibody (%) | 17/22 (77)                                              | 49/51 (96)                                                 | 0.02        | F |
| Active smoking (%)                              | 4/22 (18)                                               | 16/51 (31)                                                 | 0.39        | F |
| Concomitant corticosteroid therapy (%)          | 8/22 (36)                                               | 32/48 (67)                                                 | 0.02        | F |
| Prior bowel surgery (%)                         | 6/22 (27)                                               | 16/51 (31)                                                 | 0.79        | F |
| Phenotype (B1/B2/B3)/n (%)                      | (5/11/6)/22 (23/50/27)                                  | (13/18/20)/51 (26/35/39)                                   | 0.47        | C |
| Extraintestinal manifestations (%)              | 7/22 (32)                                               | 18/53 (34)                                                 | 0.795       | F |

Data are presented as mean ± standard error of mean or frequencies (%).

<sup>M</sup> Mann-Withney-U test

<sup>U</sup> Unpaired t test

<sup>C</sup> Chi-square test

<sup>F</sup> Fisher exact test

### Supplementary Table 7

Clinical remission after one year of treatment: Univariable analysis of baseline parameters in patients with CD.

|                                                    | CD patients with<br>CLINICAL REMISSION<br>after one year on<br>treatment | CD patients with NO<br>CLINICAL<br>REMISSION after<br>one year on<br>treatment | P value |   |
|----------------------------------------------------|--------------------------------------------------------------------------|--------------------------------------------------------------------------------|---------|---|
| Disease duration from<br>initial diagnosis [years] | 16.6±2.44                                                                | 11±2.15                                                                        | 0.19    | M |
| Age at initial diagnosis<br>[years]                | 25.6±2.94                                                                | 30.3±3.13                                                                      | 0.19    | M |
| CRP [mg/L]                                         | 4.95±1.11                                                                | 9.16±2.77                                                                      | 0.12    | U |
| Hb [g/dL]                                          | 14.2±0.53                                                                | 12.8±0.56                                                                      | 0.10    | U |
| Leukocytes x10 <sup>3</sup> /μL                    | 11.8±1.23                                                                | 11±1.51                                                                        | 0.68    | U |
| Endoscopic disease<br>activity                     | 13±1.93                                                                  | 14.4±4.08                                                                      | 0.75    | U |
| Clinical disease activity                          | 8.33±1.47                                                                | 10±2.1                                                                         | 0.63    | M |
| Disease extent<br>(L1/L2/L3)/n (%)                 | (1/3/12)/16 (6/19/75)                                                    | (4/1/4)/9 (44/11/44)                                                           | 0.07    | C |
| First flare treated with<br>corticosteroids (%)    | 12/15 (80)                                                               | 7/8 (88)                                                                       | >0.99   | F |
| Previous treatment with<br>anti TNF-α antibody (%) | 14/16 (88)                                                               | 9/9 (100)                                                                      | 0.52    | F |
| Active smoking (%)                                 | 5/16 (31)                                                                | 1/8 (13)                                                                       | 0.62    | F |
| Concomitant<br>corticosteroid therapy<br>(%)       | 7/15 (47)                                                                | 4/9 (44)                                                                       | >0.99   | F |
| Phenotype (B1/B2/B3)/n<br>(%)                      | (5/8/3)/16 (31/50/19)                                                    | (3/2/4)/9 (33/22/44)                                                           | 0.29    | C |
| Extraintestinal<br>Manifestations (%)              | 7/16 (44)                                                                | 2/9 (22)                                                                       | 0.40    | F |

<sup>M</sup> Mann-Whitney-U test

<sup>U</sup> Unpaired t test

<sup>C</sup> Chi-square test

<sup>F</sup> Fisher exact test

### Supplementary Table 8

Clinical corticosteroid-free remission after one year of treatment: Univariable analysis of baseline parameters in patients with CD.

|                                                    | CD patients with<br>CLINICAL STEROID-<br>FREE REMISSION<br>after one year on<br>treatment | CD patients with NO<br>CLINICAL STEROID-<br>FREE REMISSION after<br>one year on treatment | P value |   |
|----------------------------------------------------|-------------------------------------------------------------------------------------------|-------------------------------------------------------------------------------------------|---------|---|
| Disease duration from<br>initial diagnosis [years] | 17.8±2.63                                                                                 | 10.41±1.78                                                                                | 0.03    | M |
| Age at initial diagnosis<br>[years]                | 23.5±2.64                                                                                 | 32.1±3.28                                                                                 | 0.04    | M |
| CRP [mg/L]                                         | 4.26±1.11                                                                                 | 9.08±2.24                                                                                 | 0.06    | U |
| Hb [g/dL]                                          | 14±0.65                                                                                   | 13.2±0.52                                                                                 | 0.39    | U |
| Leukocytes x10 <sup>3</sup> /μL                    | 11.7±1.55                                                                                 | 11.2±1.20                                                                                 | 0.84    | M |
| Endoscopic disease<br>activity                     | 11.8±1.86                                                                                 | 15.2±3.42                                                                                 | 0.44    | U |
| Clinical disease activity                          | 7.08±1.33                                                                                 | 11.2±1.93                                                                                 | 0.17    | M |
| Disease extent<br>(L1/L2/L3)/n (%)                 | (1/3/10)/14 (7/21/71)                                                                     | (4/1/6)/11 (36/9/55)                                                                      | 0.18    | C |
| First flare treated with<br>corticosteroids (%)    | 10/13 (77)                                                                                | 9/10 (90)                                                                                 | 0.60    | F |
| Previous treatment with<br>anti TNF-α antibody (%) | 12/14 (86)                                                                                | 11/11 (100)                                                                               | 0.49    | F |
| Active smoking (%)                                 | 3/14 (21)                                                                                 | 4/11 (36)                                                                                 | 0.66    | F |
| Concomitant<br>corticosteroid therapy<br>(%)       | 6/13 (46)                                                                                 | 5/11 (46)                                                                                 | >0.99   | F |
| Phenotype (B1/B2/B3)/n<br>(%)                      | (5/7/2)/14 (36/50/14)                                                                     | (3/3/5)/11 (27/27/46)                                                                     | 0.22    | C |
| Extraintestinal<br>Manifestations (%)              | 7/14 (50)                                                                                 | 2/11 (18)                                                                                 | 0.21    | F |

<sup>M</sup> Mann-Whitney-U test

<sup>U</sup> Unpaired t test

<sup>C</sup> Chi-square test

<sup>F</sup> Fisher exact test



**Supplementary Table 9**

Multivariable logistic regression analysis of secondary endpoints in patients with CD.

| PARAMETER                                                     | OR   | 95% CI (profile likelihood) | P value | P value summary |
|---------------------------------------------------------------|------|-----------------------------|---------|-----------------|
| <b>CINICAL CORTICOSTEROID-FREE REMISSION at week 17+/-0.5</b> |      |                             |         |                 |
| Age at initial diagnosis [years]                              | 1.1  | 1.02 to 1.2                 | 0.02    | *               |
| CRP [mg/dL]                                                   | 1.01 | 0.9 to 1.08                 | 0.82    | ns              |
| Hb [g/dl]                                                     | 1.50 | 0.81 to 3.12                | 0.22    | ns              |
| Leukocytes x10 <sup>3</sup> /ul                               | 1.02 | 0.75 to 1.35                | 0.90    | ns              |
| HBI                                                           | 0.9  | 0.74 to 1.06                | 0.22    | ns              |
| First flare treated with corticosteroids                      | 0.66 | 0.08 to 6.23                | 0.70    | ns              |
| Previous treatment with anti TNF- $\alpha$ antibody           | 0.03 | 0.001 to 0.62               | 0.04    | *               |
| Concomitant corticosteroid therapy                            | 0.52 | 0.08 to 3.41                | 0.56    | ns              |
| <b>CLINICAL REMISSION after one year</b>                      |      |                             |         |                 |
| Disease Duration from initial diagnosis                       | 1.02 | 1.00 to 1.06                | 0.09    | ns              |
| Age at initial diagnosis [years]                              | 0.87 | 0.66 to 1.03                | 0.17    | ns              |
| CRP [mg/dL]                                                   | 1.57 | 0.93 to 4.09                | 0.19    | ns              |
| Hb [g/dl]                                                     | 11.9 | 1.70 to 17                  | 0.1     | ns              |
| Disease Extent                                                | 2.05 | 0.21 to 26.4                | 0.52    | ns              |
| <b>CINICAL CORTICOSTEROID-FREE REMISSION after one year</b>   |      |                             |         |                 |
| Disease Duration from initial diagnosis                       | 1.01 | 0.1 to 1.04                 | 0.16    | ns              |
| Age at initial diagnosis [years]                              | 0.88 | 0.7 to 1.03                 | 0.17    | ns              |
| CRP [mg/dL]                                                   | 0.95 | 0.64 to 1.35                | 0.79    | ns              |
| HBI                                                           | 0.94 | 0.75 to 1.16                | 0.57    | ns              |
| Disease Extent                                                | 1.72 | 0.42 to 9.72                | 0.47    | ns              |

OR, Odds ratio
